# Supplementary material
Source: PubMed Central journal article supplement (PMC9857219)
Supplement: jamainternmed-e225618-s003.pdf [file jamainternmed-e225618-s003.pdf]

## Data Sharing Statement

Ladapo. Effectiveness of Goal-Directed and Outcome-Based Financial Incentives for Weight Loss in Primary Care Patients With Obesity Living in Socioeconomically Disadvantaged Neighborhoods. *JAMA Intern Med*. Published December 05, 2022.  
doi:10.1001/jamainternmed.2022.5618

### Data

**Data available:** Yes

**Data types:** Deidentified participant data, Data dictionary

**How to access data:** email requests can be sent to [melanie.jay@nyulangone.org](mailto:melanie.jay@nyulangone.org)

**When available:** With publication

### Supporting Documents

**Document types:** Informed consent form

**How to access documents:** [melanie.jay@nyulangone.org](mailto:melanie.jay@nyulangone.org)

**When available:** With publication

### Additional Information

**Who can access the data:** Anyone requesting the data

**Types of analyses:** For any studies other than ongoing or planned analyses from our study team

**Mechanisms of data availability:** With investigator support
